# Supplementary material for: The Potential of Technology-Based Psychological Interventions for Anorexia and Bulimia Nervosa: A Systematic Review and Recommendations for Future Research
Source: PubMed Central journal article supplement (PMC4397416; doi:10.2196/jmir.3554), 2015-03-31
Supplement: jmir_v17i3e85_app2.pdf [file jmir_v17i3e85_app2.pdf]

## Within- and between-group effect sizes and confidence intervals for included studies (posttreatment and follow-up) <sup>a</sup>

| Study                                                  | Symptoms                             | Within-group effect size<br>Baseline – Posttreatment<br>[lower CI; upper CI]                    | Within-group effect size<br>Baseline – Follow-up 1<br>Baseline – Follow-up 2<br>[lower CI; upper CI] | Between-group<br>effect size<br>Posttreatment<br>[lower CI;<br>upper CI] | Between-group effect size<br>Follow-up 1<br>Follow-up 2<br>[lower CI; upper CI] |
|--------------------------------------------------------|--------------------------------------|-------------------------------------------------------------------------------------------------|------------------------------------------------------------------------------------------------------|--------------------------------------------------------------------------|---------------------------------------------------------------------------------|
| <b>Computer- and Internet-based Unguided Self-help</b> |                                      |                                                                                                 |                                                                                                      |                                                                          |                                                                                 |
| Bara-Carril<br>et al [42]                              | Binging                              |                                                                                                 | <b>0.75 [0.23; 1.26]</b>                                                                             |                                                                          |                                                                                 |
|                                                        | Vomiting                             |                                                                                                 | <b>0.63 [0.12; 1.14]</b>                                                                             |                                                                          |                                                                                 |
| Schmidt<br>et al [43]                                  | ED psychopathology                   |                                                                                                 |                                                                                                      |                                                                          |                                                                                 |
|                                                        | Binging                              |                                                                                                 |                                                                                                      |                                                                          |                                                                                 |
|                                                        | Vomiting                             |                                                                                                 |                                                                                                      |                                                                          |                                                                                 |
| Johnston<br>et al [44]                                 | ED psychopathology<br>(EDE Global)   | <u>CD-ROM</u> : 0.28 [-0.16; 0.71]<br><u>WL</u> : 0.27 [-0.15; 0.69]                            | <u>CD-ROM</u> : 0.35 [-0.10; 0.81]<br><u>WL</u> : <b>0.51 [0.04; 0.97]</b>                           | 0.09 [-0.37;<br>0.54]                                                    | 0.22 [-0.30; 0.73]                                                              |
|                                                        | Binging                              |                                                                                                 |                                                                                                      |                                                                          |                                                                                 |
|                                                        | Vomiting                             |                                                                                                 |                                                                                                      |                                                                          |                                                                                 |
| Sánchez-Ortiz<br>et al [48]                            | ED psychopathology<br>(BITE Total)   | <u>Therapy</u> : 0.17 [-0.27; 0.61]<br><u>Control</u> : 0.25 [-0.21; 0.71]                      | <u>Therapy</u> : 0.23 [-0.21; 0.67]<br><u>Control</u> : 0.17 [-0.28; 0.63]                           | 0.16 [-0.29;<br>0.61]                                                    | 0.03 [-0.42; 0.48]                                                              |
|                                                        | Binging                              | <u>iCBT</u> : <b>0.79 [0.31; 1.26]</b><br><u>WL</u> : 0.31 [-0.17; 0.79]                        | <u>iCBT</u> : <b>1.05 [0.54; 1.57]</b><br><u>WL</u> : <b>0.73 [0.20; 1.27]</b>                       | -0.40 [-0.88;<br>0.09]                                                   | <b>-0.59 [-1.15; -0.03]</b>                                                     |
|                                                        | Vomiting                             | <u>iCBT</u> : <b>0.49 [0.02; 0.95]</b><br><u>WL</u> : 0.22 [-0.26; 0.70]                        | <u>iCBT</u> : <b>0.75 [0.25; 1.25]</b><br><u>WL</u> : <b>0.56 [0.03; 1.08]</b>                       | -0.33 [-0.82;<br>0.15]                                                   | -0.40 [-0.96; 0.15]                                                             |
| Ljottson<br>et al [49]                                 | ED psychopathology<br>(EDE Global)   | <u>iCBT</u> : <b>1.27 [0.77; 1.77]</b><br><u>WL</u> : 0.47 [-0.01; 0.95]                        | <u>iCBT</u> : <b>1.73 [1.16; 2.29]</b><br><u>WL</u> : <b>0.90 [0.36; 1.44]</b>                       | <b>-1.23 [-1.76;<br/>-0.71]</b>                                          | <b>-0.97 [-1.54; -0.39]</b>                                                     |
|                                                        | Binging                              | <u>Treatment</u> : <b>1.42 [0.88; 1.96]</b><br><u>Control</u> : 0.17 [-0.65; 0.31]              |                                                                                                      | <b>-0.67 [-1.17;<br/>-0.18]</b>                                          |                                                                                 |
|                                                        | Vomiting                             | <b>Purging</b><br><u>Treatment</u> : 0.60 [-0.11; 1.09]<br><u>Control</u> : -0.22 [-0.70; 0.26] |                                                                                                      | <b>Purging</b><br><b>-2.06 [-2.66;<br/>-1.47]</b>                        |                                                                                 |
| Nevonen<br>et al [52]                                  | ED psychopathology<br>(EDE-Q Global) | <u>Treatment</u> : <b>1.04 [0.52; 1.55]</b><br><u>Control</u> : 0.10 [-0.38; 0.57]              |                                                                                                      | <b>-1.13 [-1.65;<br/>-0.61]</b>                                          |                                                                                 |
|                                                        | Binging                              |                                                                                                 | 0.30 [-0.20; 0.80]                                                                                   |                                                                          |                                                                                 |
|                                                        | Vomiting                             |                                                                                                 | 0.46 [-0.04; 0.96]                                                                                   |                                                                          |                                                                                 |
| Carrard<br>et al [54]                                  | ED psychopathology                   |                                                                                                 |                                                                                                      |                                                                          |                                                                                 |
|                                                        | Binging                              | <b>0.64 [0.33; 0.95]</b>                                                                        |                                                                                                      |                                                                          |                                                                                 |
|                                                        | Vomiting                             | <b>0.82 [0.50; 1.14]</b>                                                                        |                                                                                                      |                                                                          |                                                                                 |
|                                                        | ED psychopathology                   |                                                                                                 |                                                                                                      |                                                                          |                                                                                 |

|                                                     |                                   |                                                                                        |                                                                                           |                     |                                                    |
|-----------------------------------------------------|-----------------------------------|----------------------------------------------------------------------------------------|-------------------------------------------------------------------------------------------|---------------------|----------------------------------------------------|
| Wagner et al [55]                                   | Binging                           | <u>INT-GSH</u> : 0.24 [-0.09; 0.57]<br><u>BIB-GSH</u> : 0.32 [-0.07; 0.70]             | <u>INT-GSH</u> : 0.33 [-0.01; 0.66]<br><u>BIB-GSH</u> : 0.31 [-0.08; 0.69]                | 0.03 [-0.33; 0.39]  | -0.03 [-0.39; 0.33]<br>-0.13 [-0.49; 0.23]         |
|                                                     | Vomiting                          | <u>INT-GSH</u> : <b>0.35 [0.02; 0.69]</b><br><u>BIB-GSH</u> : 0.35 [-0.03; 0.74]       | <u>INT-GSH</u> : <b>0.39 [0.06; 0.73]</b><br><u>BIB-GSH</u> : <b>0.39 [0.00; 0.78]</b>    | 0.14 [-0.22; 0.50]  | 0.14 [-0.22; 0.50]<br>-0.04 [-0.40; 0.32]          |
|                                                     | ED psychopathology (EDI-2 Total)  | <u>INT-GSH</u> : <b>0.50 [0.17; 0.84]</b><br><u>BIB-GSH</u> : <b>0.49 [0.10; 0.87]</b> | <u>INT-GSH</u> : <b>0.72 [0.38; 1.06]</b><br><u>BIB-GSH</u> : <b>0.61 [0.22; 1.00]</b>    | -0.03 [-0.38; 0.33] | -0.13 [-0.48; 0.23]<br>-0.06 [-0.42; 0.29]         |
| Leung et al [56]                                    | Binging                           | 0.28 [-0.07; 0.63]                                                                     |                                                                                           |                     |                                                    |
|                                                     | Vomiting                          | -0.01 [-0.35; 0.34]                                                                    |                                                                                           |                     |                                                    |
|                                                     | ED psychopathology (EDE-Q Global) | <b>0.64 [0.29; 0.99]</b>                                                               |                                                                                           |                     |                                                    |
| Pretorius et al [57]                                | Binging                           | <b>4.41 [3.82; 5.01]</b>                                                               | <b>4.39 [3.82; 4.96]</b>                                                                  |                     |                                                    |
|                                                     | Vomiting                          | <b>3.54 [3.03; 4.06]</b>                                                               | <b>3.96 [3.43; 4.49]</b>                                                                  |                     |                                                    |
|                                                     | ED psychopathology (EDE Global)   | <b>7.05 [6.19; 7.91]</b>                                                               | <b>5.46 [4.79; 6.13]</b>                                                                  |                     |                                                    |
| Wagner et al [58]                                   | Binging                           | <u>Adults</u> : 0.37 [-0.05; 0.79]<br><u>Adolescents</u> : 0.31 [-0.39; 1.01]          | <u>Adults</u> : <b>0.66 [0.23; 1.09]</b><br><u>Adolescents</u> : 0.26 [-0.43; 0.96]       | -0.49 [-1.07; 0.09] | <b>-0.60 [-1.18; -0.02]</b><br>-0.25 [-0.82; 0.32] |
|                                                     | Vomiting                          | <u>Adults</u> : 0.30 [-0.11; 0.72]<br><u>Adolescents</u> : 0.55 [-0.16; 1.26]          | <u>Adults</u> : <b>0.44 [0.02; 0.85]</b><br><u>Adolescents</u> : 0.51 [-0.19; 1.21]       | -0.22 [-0.79; 0.35] | -0.38 [-0.95; 0.20]<br>-0.26 [-0.83; 0.31]         |
|                                                     | ED psychopathology (EDI-2 Total)  | <u>Adults</u> : <b>0.75 [0.33; 1.17]</b><br><u>Adolescents</u> : 0.61 [-0.15; 1.36]    | <u>Adults</u> : <b>1.37 [0.92; 1.82]</b><br><u>Adolescents</u> : <b>0.77 [0.00; 1.53]</b> | 0.01 [-0.58; 0.61]  | -0.28 [-0.88; 0.32]<br>-0.10 [-0.69; 0.50]         |
| <b>Internet-based Therapist-delivered Treatment</b> |                                   |                                                                                        |                                                                                           |                     |                                                    |
| Robinson & Serfaty [59]                             | Binging                           |                                                                                        | <u>Adults</u> : <b>1.02 [0.59; 1.44]</b><br><u>Adolescents</u> : <b>0.79 [0.02; 1.56]</b> |                     |                                                    |
|                                                     | Vomiting                          |                                                                                        |                                                                                           |                     |                                                    |
|                                                     | ED psychopathology                | <b>BITE severity</b>                                                                   |                                                                                           |                     |                                                    |

|                                                  |                                       |                                                                                                    |                                                                                                                                                 |                                               |                                              |
|--------------------------------------------------|---------------------------------------|----------------------------------------------------------------------------------------------------|-------------------------------------------------------------------------------------------------------------------------------------------------|-----------------------------------------------|----------------------------------------------|
|                                                  | (BITE)                                | 0.41 [-0.17; 1.00]                                                                                 |                                                                                                                                                 |                                               |                                              |
|                                                  |                                       | <b>BITE symptoms</b>                                                                               |                                                                                                                                                 |                                               |                                              |
|                                                  |                                       | 0.56 [-0.03; 1.15]                                                                                 |                                                                                                                                                 |                                               |                                              |
| Mitchell et al [62]                              | Binging                               | <u>TV-CBT: 0.62 [0.22; 1.03]</u><br><u>F2F-CBT: 0.80 [0.39; 1.21]</u>                              | <u>TV-CBT: 0.60 [0.19; 1.02]</u><br><u>F2F-CBT: 0.73 [0.30; 1.15]</u>                                                                           | 0.21 [-0.23; 0.65]                            | 0.12 [-0.35; 0.58]<br><br>0.28 [-0.27; 0.82] |
|                                                  | Vomiting                              | <u>TV-CBT: 0.87 [0.46; 1.28]</u><br><u>F2F-CBT: 1.07 [0.65; 1.49]</u>                              | <u>TV-CBT: 0.31 [-0.15; 0.76]</u><br><u>F2F-CBT: 0.62 [0.15; 1.09]</u><br><u>TV-CBT: 0.88 [0.46; 1.31]</u><br><u>F2F-CBT: 0.92 [0.49; 1.35]</u> | 0.34 [-0.10; 0.78]                            | 0.12 [-0.35; 0.58]<br><br>0.41 [-0.14; 0.96] |
|                                                  | ED psychopathology                    |                                                                                                    | <u>TV-CBT: 0.50 [0.05; 0.96]</u><br><u>F2F-CBT: 0.90 [0.42; 1.37]</u>                                                                           |                                               |                                              |
| <b>Internet-based Relapse Prevention</b>         |                                       |                                                                                                    |                                                                                                                                                 |                                               |                                              |
| Fichter et al [63, 64]                           | Binging                               |                                                                                                    |                                                                                                                                                 |                                               |                                              |
|                                                  | Vomiting                              |                                                                                                    |                                                                                                                                                 |                                               |                                              |
|                                                  | ED psychopathology (EDI-2 Total, BMI) | <b>EDI-2 Total</b><br><u>RP: -0.34 [-0.61; -0.07]</u><br><u>TAU: -0.57 [-0.84; -0.30]</u>          | <b>BMI</b><br><u>RP: -0.44 [-0.74; -0.14]</u><br><u>TAU: -0.30 [-0.55; -0.04]</u>                                                               | <b>EDI-2 Total</b><br>-0.27 [-0.53; 0.00]     | <b>BMI</b><br>0.15 [-0.12; 0.43]             |
|                                                  |                                       | <b>BMI</b><br><u>RP: -0.18 [-0.48; 0.11]</u><br><u>TAU: 0.06 [-0.20; 0.31]</u>                     |                                                                                                                                                 | <b>BMI</b><br>0.21 [-0.04; 0.47]              |                                              |
| Mezei et al [65]                                 | Binging                               | 0.06 [-0.46; 0.58]                                                                                 |                                                                                                                                                 |                                               |                                              |
|                                                  | Vomiting                              | 0.12 [-0.41; 0.64]                                                                                 |                                                                                                                                                 |                                               |                                              |
|                                                  | ED psychopathology (EDE-Q Global)     | 0.28 [-0.25; 0.81]                                                                                 |                                                                                                                                                 |                                               |                                              |
| <b>Body Image and Eating Disorder Prevention</b> |                                       |                                                                                                    |                                                                                                                                                 |                                               |                                              |
| Gollings & Paxton [66]                           | Body dissatisfaction (BSQ)            | <u>Int.: 0.97 [0.31; 1.62]</u><br><u>F2F: 0.73 [0.07; 1.39]</u>                                    | <u>Int.: 0.96 [0.31; 1.62]</u><br><u>F2F: 0.92 [0.25; 1.59]</u>                                                                                 | -0.27 [-0.90; 0.36]                           | -0.11 [-0.74; 0.52]                          |
| Paxton et al [67]                                | Body dissatisfaction (BSQ)            | <u>Int.: 0.58 [0.12; 1.05]</u><br><u>F2F: 1.19 [0.72; 1.65]</u><br><u>Del.: 0.16 [-0.29; 0.62]</u> |                                                                                                                                                 | <u>Int. vs. F2F:</u><br>0.32 [-0.13; 0.76]    |                                              |
|                                                  |                                       |                                                                                                    |                                                                                                                                                 | <u>Int. vs. Del.:</u><br>-0.53 [-1.00; -0.07] |                                              |

|                                                               |                                                  |                                                                                                                                                                |                                                                                                                                                                                                                                                                                                                                      |                                                                                                                                                                 |                                                                                                                                                                                                                                                                                                                   |
|---------------------------------------------------------------|--------------------------------------------------|----------------------------------------------------------------------------------------------------------------------------------------------------------------|--------------------------------------------------------------------------------------------------------------------------------------------------------------------------------------------------------------------------------------------------------------------------------------------------------------------------------------|-----------------------------------------------------------------------------------------------------------------------------------------------------------------|-------------------------------------------------------------------------------------------------------------------------------------------------------------------------------------------------------------------------------------------------------------------------------------------------------------------|
| Stice<br>et al [68, 69]                                       | Thin-ideal<br>internalization<br>(IBSS-R)        | <u>eBody</u> : <b>0.69 [0.03; 1.34]</b><br><u>Body</u> : <b>0.75 [0.29; 1.21]</b><br><u>Brochure</u> : 0.08 [-0.54; 0.70]<br><u>Video</u> : 0.21 [-0.31; 0.73] | <u>eBody</u> : 0.24 [-0.40; 0.88]<br><u>Body</u> : <b>0.89 [0.42; 1.35]</b><br><u>Brochure</u> : 0.42 [-0.21; 1.04]<br><u>Video</u> : 0.37 [-0.15; 0.89]<br><br><u>eBody</u> : 0.33 [-0.31; 0.97]<br><u>Body</u> : <b>0.78 [0.32; 1.24]</b><br><u>Brochure</u> : <b>0.81 [0.16; 1.45]</b><br><u>Video</u> : <b>0.57 [0.04; 1.09]</b> | <u>eBody vs. Body</u> :<br>-0.18 [-0.73; 0.37]<br><u>eBody vs. Brochure</u> :<br><b>-0.84 [-1.49; -0.18]</b><br><u>eBody vs. Video</u> :<br>-0.55 [-1.14; 0.04] | <u>eBody vs. Body</u> :<br>0.34 [-0.21; 0.89]<br><u>eBody vs. Brochure</u> :<br>-0.14 [-0.77; 0.49]<br><u>eBody vs. Video</u> :<br>0.03 [-0.55; 0.61]<br><br><u>eBody vs. Body</u> :<br>0.23 [-0.32; 0.78]<br><u>eBody vs. Brochure</u> :<br>0.05 [-0.58; 0.68]<br><u>eBody vs. Video</u> :<br>0.10 [-0.48; 0.68] |
| Serdar<br>et al [70]                                          | Thin-ideal<br>internalization<br>(IBSS-R)        | <u>Online</u> : 0.18 [-0.09; 0.44]<br><u>F2F</u> : 0.24 [-0.02; 0.51]<br><u>Ass.</u> : 0.09 [-0.17; 0.35]                                                      |                                                                                                                                                                                                                                                                                                                                      | <u>Online vs. F2F</u> :<br>0.05 [-0.21; 0.32]<br><u>Online vs. Ass.</u> :<br>-0.23 [-0.49; 0.03]                                                                |                                                                                                                                                                                                                                                                                                                   |
| Zabinski<br>et al [71]                                        | ED psychopathology<br>(EDE-Q Global)             | <u>Int.</u> : <b>0.75 [0.23; 1.27]</b><br><u>Control</u> : 0.03 [-0.48; 0.53]                                                                                  | <u>Int.</u> : <b>0.58 [0.06; 1.10]</b><br><u>Control</u> : -0.04 [-0.55; 0.46]                                                                                                                                                                                                                                                       | -0.25 [-0.75; 0.26]                                                                                                                                             | -0.36 [-0.87; 0.15]                                                                                                                                                                                                                                                                                               |
| Ohlmer<br>et al [72]                                          | ED psychopathology<br>(EDE-Q Global)             | <b>0.82 [0.34; 1.30]</b>                                                                                                                                       | <b>0.74 [0.26; 1.21]</b>                                                                                                                                                                                                                                                                                                             |                                                                                                                                                                 |                                                                                                                                                                                                                                                                                                                   |
| Heinicke<br>et al [73]                                        | Body dissatisfaction<br>(BSQ)                    | <u>Int.</u> : <b>0.59 [0.12; 1.07]</b><br><u>Del.</u> : -0.04 [-0.50; 0.42]                                                                                    |                                                                                                                                                                                                                                                                                                                                      | <b>-0.70 [-1.18; -0.23]</b>                                                                                                                                     |                                                                                                                                                                                                                                                                                                                   |
| <b>Eating Disorder Symptoms/Subthreshold Eating Disorders</b> |                                                  |                                                                                                                                                                |                                                                                                                                                                                                                                                                                                                                      |                                                                                                                                                                 |                                                                                                                                                                                                                                                                                                                   |
| Ruwaard<br>et al [74]                                         | Binging                                          | <u>Online</u> : <b>1.05 [0.55; 1.55]</b><br><u>Biblio.</u> : 0.16 [-0.31; 0.63]<br><u>WL</u> : 0.31 [-0.17; 0.78]                                              | <u>Online</u> : <b>1.00 [0.50; 1.50]</b><br><u>Biblio.</u> : 0.28 [-0.20; 0.75]                                                                                                                                                                                                                                                      | <u>Online vs. Biblio.</u> :<br><b>-0.70 [-1.18; -0.21]</b><br><u>Online vs. WL</u> :<br>-0.43 [-0.90; 0.05]                                                     | <u>Online vs. Biblio.</u> :<br><b>-0.43 [-0.82; -0.04]</b>                                                                                                                                                                                                                                                        |
|                                                               | Vomiting<br>ED psychopathology<br>(EDE-Q Global) | <u>Online</u> : <b>1.18 [0.67; 1.68]</b><br><u>Biblio.</u> : <b>0.54 [0.07; 1.02]</b><br><u>WL</u> : 0.34 [-0.13; 0.82]                                        | <u>Online</u> : <b>1.10 [0.60; 1.60]</b><br><u>Biblio.</u> : <b>1.03 [0.54; 1.53]</b>                                                                                                                                                                                                                                                | <u>Online vs. Biblio.</u> :<br>-0.37 [-0.84; 0.10]<br><u>Online vs. WL</u> :                                                                                    | <u>Online vs. Biblio.</u> :<br>0.14 [-0.33; 0.61]                                                                                                                                                                                                                                                                 |

|                                                     |                                               |                                                                                                            |                                                                         |                                                    |                             |
|-----------------------------------------------------|-----------------------------------------------|------------------------------------------------------------------------------------------------------------|-------------------------------------------------------------------------|----------------------------------------------------|-----------------------------|
| Jacobi<br>et al [75]                                | Binging                                       | <b>SB+:</b> 0.77 [0.37; 1.17]<br><b>Control:</b> 0.00 [-0.38; 0.38]                                        | <b>SB+:</b> 1.00 [0.59; 1.41]<br><b>Control:</b> 0.20 [-0.19; 0.58]     | <b>-0.50 [-0.97; -0.02]</b><br>-0.29 [-0.67; 0.10] | <b>-0.43 [-0.82; -0.04]</b> |
|                                                     | Vomiting                                      | <b>SB+:</b> 0.28 [-0.11; 0.67]<br><b>Control:</b> -0.13 [-0.52; 0.25]                                      | <b>SB+:</b> 0.14 [-0.25; 0.53]<br><b>Control:</b> -0.31 [-0.69; 0.08]   | -0.21 [-0.60; 0.18]                                | -0.33 [-0.72; 0.06]         |
|                                                     | ED psychopathology<br>(EDE-Q Global)          | <b>SB+:</b> 0.62 [0.23; 1.02]<br><b>Control:</b> 0.30 [-0.09; 0.69]                                        | <b>SB+:</b> 0.99 [0.58; 1.41]<br><b>Control:</b> 0.20 [-0.19; 0.59]     | -0.10 [-0.48; 0.29]                                | <b>-0.50 [-0.89; -0.11]</b> |
| <b>Motivation</b><br>Hötzel<br>et al [76]           | Binging                                       |                                                                                                            |                                                                         |                                                    |                             |
|                                                     | Vomiting                                      | <b>Intervention:</b> 0.06 [-0.21; 0.33]<br><b>Control:</b> 0.07 [-0.20; 0.33]                              |                                                                         | -0.22 [-0.49; 0.05]                                |                             |
|                                                     | Motivation<br>(SOCQ-ED Item 6)                | <b>Intervention:</b> -0.37 [-0.65; -0.10]<br><b>Control:</b> 0.02 [-0.24; 0.29]                            |                                                                         | 0.13 [-0.14; 0.40]                                 |                             |
| Leung<br>et al [77]                                 | Binging                                       | 0.37 [-0.04; 0.78]                                                                                         | 0.11 [-0.30; 0.52]                                                      |                                                    |                             |
|                                                     | Vomiting                                      | -0.03 [-0.44; 0.38]                                                                                        | 0.17 [-0.24; 0.58]                                                      |                                                    |                             |
|                                                     | Motivation                                    | <b>Giving up binging</b><br>-0.06 [-0.48; 0.37]                                                            | <b>Giving up binging</b><br>-0.28 [-0.71; 0.14]                         |                                                    |                             |
|                                                     | <b>Giving up vomiting</b>                     | <b>Giving up vomiting</b>                                                                                  |                                                                         |                                                    |                             |
|                                                     | 0.02 [-0.40; 0.45]                            | -0.01 [-0.43; 0.41]                                                                                        |                                                                         |                                                    |                             |
| <b>Carers/Parents</b><br>Binford Hopf<br>et al [78] | ED symptom impact<br>(EDSIS Total)            | <b>1.18 [0.23; 2.13]</b>                                                                                   |                                                                         |                                                    |                             |
| Grover<br>et al [79]                                | Anxiety and depression<br>(HADS Total)        | <b>0.70 [0.11; 1.28]</b>                                                                                   | <b>0.78 [0.16; 1.40]</b>                                                |                                                    |                             |
| Hoyle<br>et al [81]                                 | High-expressed<br>emotion<br>(LEE)            | <b>QAO-NoG:</b> 0.16 [-0.50; 0.81]<br><b>QAO-G:</b> 0.34 [-0.32; 1.00]                                     | <b>QAO-NoG:</b> -0.08 [-0.73; 0.58]<br><b>QAO-G:</b> 0.49 [-0.17; 1.16] | 0.50 [-0.16; 1.16]                                 | <b>0.94 [0.25; 1.63]</b>    |
| Bruning Brown<br>et al [82]                         | Parental attitudes and<br>criticism<br>(PACS) | <b>Critical to others</b><br><b>Intervention:</b> 0.65 [0.04; 1.26]<br><b>Control:</b> 0.00 [-0.40; 0.40]  |                                                                         | <b>Critical to others</b><br>-0.27 [-0.63; 0.08]   |                             |
|                                                     |                                               | <b>Healthy outlook</b><br><b>Intervention:</b> -0.74 [-1.35; -0.13]<br><b>Control:</b> -0.16 [-0.56; 0.25] |                                                                         | <b>Healthy outlook</b><br>0.29 [-0.35; 0.93]       |                             |

**Mobile/SMS Text Messaging**

|                        |                                      |                                      |                                      |
|------------------------|--------------------------------------|--------------------------------------|--------------------------------------|
| Shapiro<br>et al [83]  | Binging                              | <b>0.90 [0.15; 1.66]</b>             |                                      |
|                        | Vomiting                             | <b>Purging</b><br>0.72 [-0.02; 1.45] | <b>Purging</b><br>0.70 [-0.05; 1.45] |
|                        | ED psychopathology<br>(EDI-2 Total)  | <b>1.26 [0.48; 2.05]</b>             | <b>1.76 [0.90; 2.61]</b>             |
| Robinson et al<br>[84] | Binging                              | -0.20 [-0.84; 0.44]                  |                                      |
|                        | Vomiting                             | 0.16 [-0.48; 0.80]                   |                                      |
|                        | ED psychopathology                   |                                      |                                      |
| Bauer<br>et al [85]    | Binging                              |                                      |                                      |
|                        | Vomiting                             |                                      |                                      |
|                        | ED psychopathology                   |                                      |                                      |
| Cardi<br>et al [86]    | Binging                              | 0.13 [-0.38; 0.65]                   |                                      |
|                        | Vomiting                             | 0.44 [-0.08; 0.96]                   |                                      |
|                        | ED psychopathology<br>(EDE-Q Global) | 0.43 [-0.09; 0.95]                   |                                      |

<sup>a</sup> Ass. = Assessment only, BIB-GSH = Conventional guided bibliotherapy, Biblio. = Bibliotherapy, BITE = Bulimic Investigatory Test-Edinburgh, BMI = Body-Mass-Index, BSQ = Body Shape Questionnaire, CBT = Cognitive behavioral therapy, CD-ROM = Compact Disc Read Only Memory, CI = Confidence Interval, Del. = Delayed treatment group, ED = Eating Disorder, EDE = Eating Disorder Examination, EDE-Q = Eating Disorder Examination Questionnaire, EDI-2 = Eating Disorder Inventory-2, EDSIS = Eating Disorder Symptom Impact Scale, F2F = Face-to-face, HADS = Hospital Anxiety and Depression Scale, IBSS-R = Ideal-Body Stereotype Scale-Revised, iCBT = Internet-based cognitive behavioral therapy, Int. = Intervention group, INT-GSH = Internet-based guided self-help, LEE = Level of Expressed Emotion Scale, OAO-G = Overcoming Anorexia Online with Guidance, OAO-NoG = Overcoming Anorexia Online No Guidance, PACS = Parental Attitudes and Criticism Scale, RP = Relapse Prevention, SB+ = Student Bodies adapted for subthreshold EDs, SOCQ-ED = Stages of Change Questionnaire for Eating Disorders, TAU = Treatment as usual, TV-CBT = Telemedicine cognitive behavioral therapy, WL = Waiting list, Boldface data show CIs not covering zero.
