# Supplementary material for: The Potential of Technology-Based Psychological Interventions for Anorexia and Bulimia Nervosa: A Systematic Review and Recommendations for Future Research
Source: PubMed Central journal article supplement (PMC4397416; doi:10.2196/jmir.3554), 2015-03-31
Supplement: jmir_v17i3e85_app3.pdf [file jmir_v17i3e85_app3.pdf]

**Definition of abstinence in studies included in the review as well as abstinence rates and results of significance test wherever data was available <sup>a</sup>**

| Study                                                  | Definition of abstinence                                                                | Abstinence Rates                                                                                                                                                      |                                                                                           |                                                                                           |
|--------------------------------------------------------|-----------------------------------------------------------------------------------------|-----------------------------------------------------------------------------------------------------------------------------------------------------------------------|-------------------------------------------------------------------------------------------|-------------------------------------------------------------------------------------------|
|                                                        |                                                                                         | Posttreatment                                                                                                                                                         | Follow-up 1                                                                               | Follow-up 2                                                                               |
| <b>Computer- and Internet-based Unguided Self-help</b> |                                                                                         |                                                                                                                                                                       |                                                                                           |                                                                                           |
| Bara-Carril et al [42]                                 | Not at all                                                                              |                                                                                                                                                                       | <b>Binging:</b> 12.8%<br><b>Vomiting:</b> 46.2%                                           |                                                                                           |
| Schmidt et al [43]                                     | Being free of bingeing, vomiting and laxative misuse over the previous 28 days          | CD-ROM: 12.0%<br>WL: 10.0%                                                                                                                                            | CD-ROM: 13.0%<br>WL: 20.0%                                                                |                                                                                           |
| <b>Computer- and Internet-based Guided Self-help</b>   |                                                                                         |                                                                                                                                                                       |                                                                                           |                                                                                           |
| Huon [45]                                              | Symptom free                                                                            | Contact cured: 23.3%<br>Contact improved: 16.6%<br>Program only: 16.6%<br>Untreated: 0.0%                                                                             | Contact cured: 23.3%<br>Contact improved: 20.0%<br>Program only: 16.6%<br>Untreated: 6.6% | Contact cured: 46.6%<br>Contact improved: 33.3%<br>Program only: 16.6%<br>Untreated: 6.6% |
| Sánchez-Ortiz et al [48]                               | No objective binges, episodes of vomiting and laxative use in the past month            | iCBT: 25.8%<br>WL: 13.9%                                                                                                                                              | iCBT: 39.1%<br>WL: 20.7%                                                                  |                                                                                           |
| Ljotsson et al [49]                                    | Patients with no episodes of objective binge eating and purging during the last 28 days | Treatment: 37.0%<br>Control: 15.0%                                                                                                                                    | Treatment: 44.0%                                                                          |                                                                                           |
| Carrard et al [50]                                     | Abstainers no longer suffered from binges or episodes of vomiting                       | 17.2%                                                                                                                                                                 | 17.2%                                                                                     |                                                                                           |
| Fernández-Aranda et al [53]                            | Abstinence from bingeing and purging for a minimum of at least two consecutive weeks    | <b>Binging:</b> (p<.05)<br>IBT: 32.3%<br>WL: 3.2%<br><b>Vomiting:</b> (p<.05)<br>IBT: 32.3%<br>WL: 0.0%<br><b>Binging+vomiting:</b> (p<.05)<br>IBT: 22.6%<br>WL: 0.0% |                                                                                           |                                                                                           |
| Carrard et al [54]                                     | No symptoms anymore                                                                     | 23.0%                                                                                                                                                                 |                                                                                           |                                                                                           |
| Pretorius et al [57]                                   | Free of bingeing, vomiting, and laxative use                                            | 6.0%                                                                                                                                                                  | 12.0%                                                                                     |                                                                                           |
| Wagner                                                 | Abstinent from binge eating and                                                         | Adolescents: 44.4% (n.s.)                                                                                                                                             | Adolescents: 55.0% (n.s.)                                                                 |                                                                                           |

|                                                               |                                                                                                                    |                                                                                                                                                                                              |               |                                                                                                                                                                                              |                                                                                                                                                                                                        |
|---------------------------------------------------------------|--------------------------------------------------------------------------------------------------------------------|----------------------------------------------------------------------------------------------------------------------------------------------------------------------------------------------|---------------|----------------------------------------------------------------------------------------------------------------------------------------------------------------------------------------------|--------------------------------------------------------------------------------------------------------------------------------------------------------------------------------------------------------|
| et al [58]                                                    | compensatory behavior or no fulfillment of DSM-IV criteria                                                         | Adults: 38.7%                                                                                                                                                                                | Adults: 62.5% |                                                                                                                                                                                              |                                                                                                                                                                                                        |
| <b>Internet-based Therapist-delivered Treatment</b>           |                                                                                                                    |                                                                                                                                                                                              |               |                                                                                                                                                                                              |                                                                                                                                                                                                        |
| Robinson & Serfaty [60]                                       | Absence of an eating disorders diagnosis                                                                           | eBT: 22.2%<br>SDW: 14.7% (vs. eBT n.s.)<br>WL: 0.0% (vs. eBT p<.05)                                                                                                                          |               |                                                                                                                                                                                              |                                                                                                                                                                                                        |
| Simpson et al [61]                                            | Symptom free                                                                                                       | 66.7%                                                                                                                                                                                        |               |                                                                                                                                                                                              |                                                                                                                                                                                                        |
| Mitchell et al [62]                                           | None of these behaviors (binge eating, purging: vomiting, laxative abuse, diuretic abuse) in the previous 28 days  | <b>Binging:</b> (n.s.)<br>F2F-CBT: 50.0%<br>TV-CBT: 50.0%<br><b>Vomiting:</b> (n.s.)<br>F2F-CBT: 36.4%<br>TV-CBT: 30.6%<br><b>Binging+purging:</b> (n.s.)<br>F2F-CBT: 28.8%<br>TV-CBT: 27.4% | (n.s.)        | <b>Binging:</b> (n.s.)<br>F2F-CBT: 50.8%<br>TV-CBT: 48.4%<br><b>Vomiting:</b> (n.s.)<br>F2F-CBT: 33.3%<br>TV-CBT: 22.6%<br><b>Binging+purging:</b> (n.s.)<br>F2F-CBT: 25.8%<br>TV-CBT: 21.0% | (n.s.)<br><b>Binging:</b> (n.s.)<br>F2F-CBT: 53.3%<br>TV-CBT: 46.8%<br><b>Vomiting:</b> (n.s.)<br>F2F-CBT: 34.8%<br>TV-CBT: 25.8%<br><b>Binging+purging:</b> (n.s.)<br>F2F-CBT: 28.8%<br>TV-CBT: 22.6% |
| <b>Eating Disorder Symptoms/Subthreshold Eating Disorders</b> |                                                                                                                    |                                                                                                                                                                                              |               |                                                                                                                                                                                              |                                                                                                                                                                                                        |
| Ruwaard et al [74]                                            | Abstinence (ie, a frequency of 0)                                                                                  | <b>Binging:</b> (n.s.)<br>Online: 37.0%<br>Biblio.: 14.0%<br>WL: 14.0%<br><b>Purging:</b> (p<.05)<br>Online: 39.0%<br>Biblio.: 8.0%<br>WL: 8.0%                                              | (n.s.)        | <b>Binging:</b> (n.s.)<br>Online: 40.0%<br>Biblio.: 34.0%<br><b>Purging:</b> (n.s.)<br>Online: 39.0%<br>Biblio.: 30.0%                                                                       |                                                                                                                                                                                                        |
| Jacobi et al [75]                                             | Abstinent from all symptoms of disordered eating (restrictive eating, binge eating and any compensatory behaviors) | SB+: 45.1%<br>Control: 19.2%                                                                                                                                                                 |               | SB+: 45.1%<br>Control: 26.9%                                                                                                                                                                 | (p<.05)                                                                                                                                                                                                |
| <b>Mobile/SMS Text Messaging</b>                              |                                                                                                                    |                                                                                                                                                                                              |               |                                                                                                                                                                                              |                                                                                                                                                                                                        |
| Robinson et al [84]                                           | Binge and vomit free over the previous month                                                                       | 29.4%                                                                                                                                                                                        |               |                                                                                                                                                                                              |                                                                                                                                                                                                        |
| Bauer et al [85]                                              | Absence of binge eating and compensatory behaviors for a minimum of 4 weeks                                        | SMS: 37.8%<br>TAU: 18.1%                                                                                                                                                                     | (p<.05)       |                                                                                                                                                                                              |                                                                                                                                                                                                        |

<sup>a</sup> Biblio. = Bibliotherapy, CD-ROM = Compact Disc Read Only Memory, DSM = Diagnostic and Statistical Manual of Mental Disorders, eBT = Email bulimia therapy, F2F-CBT = Face-to-face cognitive behavioral therapy, IBT = Internet-based therapy, iCBT = Internet-based cognitive behavioral therapy, n.s. = not statistically significant, SB+ = Student Bodies

adapted for subthreshold eating disorders, SDW = Self-directed writing, SMS = Short Message Service, TAU = Treatment as usual, TV-CBT = Telemedicine cognitive behavioral therapy, WL = Waiting list.
